# Supplementary material
Source: PubMed Central journal article supplement (PMC4381936)
Supplement: NIHMS674257-supplement-01.pdf [file NIHMS674257-supplement-01.pdf]

## SUPPLEMENTARY ONLINE DATA

# Drp1 stabilizes p53 on the mitochondria to trigger necrosis under oxidative stress conditions *in vitro* and *in vivo*

Xing GUO\*, Hiromi SESAKI† and Xin QI\*‡<sup>1</sup>

\*Department of Physiology and Biophysics, Case Western Reserve University School of Medicine, 10900 Euclid Avenue, Cleveland, OH 44106, U.S.A.

†Department of Cell Biology, Johns Hopkins University School of Medicine, Baltimore, MD 21205, U.S.A.

‡Center for Mitochondrial Diseases, Case Western Reserve University School of Medicine, 10900 Euclid Avenue, Cleveland, OH 44106, U.S.A.

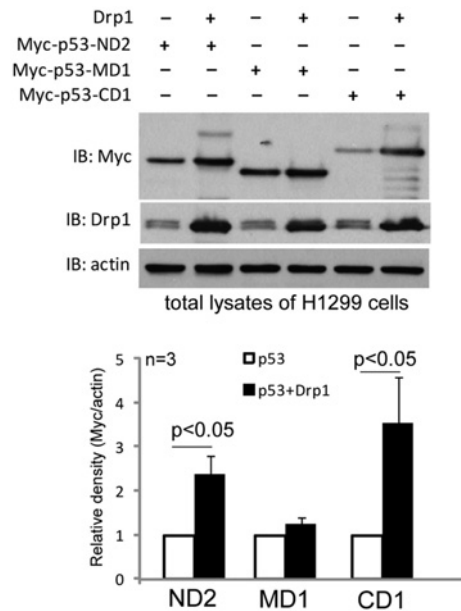

**Figure S1** Drp1 expression did not induce an increase in the protein level of p53-MD1 deletion mutant

H1299 p53-null cells were transfected with the indicated plasmids. Western blot analysis of total lysates was determined with the indicated antibodies. Actin was used as a loading control. Quantification results are means±S.D. for three independent experiments. IB, immunoblot.

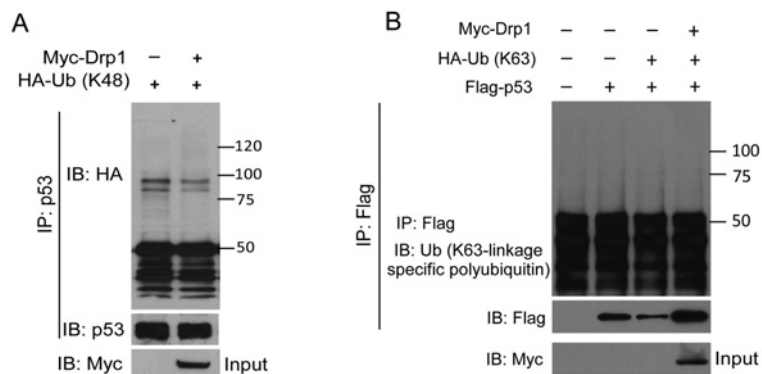

**Figure S2** Drp1 expression did not induce either Lys<sup>48</sup>- or Lys<sup>63</sup>-linked polyubiquitination of p53

MCF7 cells were transfected with the indicated plasmids. Ubiquitinated p53 was determined using the indicated antibodies. The blots are representative of three independent experiments. Molecular masses are indicated in kDa. IB, immunoblot; IP, immunoprecipitation; Ub, ubiquitin.

<sup>1</sup> To whom correspondence should be addressed (email xxq38@case.edu).

**Table S1 Primers used in the present study**

| Name          | Sequence (5'→3')        |
|---------------|-------------------------|
| Mouse-p53-F   | CCCCTGTCATCTTTTGCCCT    |
| Mouse-p53-R   | AGCTGGCAGAATAGCTTATTGAG |
| Mouse-GAPDF-F | TGGCCTTCCGTGTTCTAC      |
| Mouse-GAPDH-R | GAGTTGCTGTTGAAGTCGCA    |

---

Received 31 October 2013/21 April 2014; accepted 23 April 2014

Published as BJ Immediate Publication 23 April 2014, doi:10.1042/BJ20131438
